# 1 A rare variant in *Anp32B* impairs influenza virus replication 2 in human cells

3 Ecco Staller, Laury Baillon, Rebecca Frise, Thomas P. Peacock, Carol M. Sheppard, Vanessa  
4 Sancho-Shimizu, and Wendy Barclay\*

5 Department of Infectious Disease, Faculty of Medicine, Imperial College London, United Kingdom

6 \*Corresponding author: w.barclay@imperial.ac.uk

## 7 SUMMARY

8 Viruses require host factors to support their replication, and genetic variation in such factors  
9 can affect susceptibility to infectious disease. Influenza virus replication in human cells relies  
10 on ANP32 proteins, which serve essential but redundant roles to support influenza virus  
11 polymerase activity. Here, we investigate naturally occurring single nucleotide variants  
12 (SNV) in the human *Anp32A* and *Anp32B* genes. We note that variant rs182096718 in  
13 *Anp32B* is found at a higher frequency than other variants in either gene. This variant results  
14 in a D130A substitution in ANP32B, which is less able to support influenza virus polymerase  
15 (FluPol) activity than wildtype ANP32B. Using a split luciferase binding assay, we also show  
16 reduced interaction between ANP32B-D130A and FluPol. We then use CRISPR/Cas9  
17 genome editing to generate the mutant homozygous genotype in human eHAP cells, and  
18 show that FluPol activity and virus replication are attenuated in cells expressing wildtype  
19 ANP32A and mutant ANP32B-D130A. This is in contrast to cells that completely lack  
20 expression of ANP32B where no attenuation is seen. We conclude that ANP32B-D130A  
21 exerts a dominant negative effect on the pro-viral activity of ANP32A in cells, and suggest  
22 that carriers of rs182096718 may have some genetic protection against influenza viruses.

## 23 KEYWORDS

24 *Influenza virus, ANP32B, mutation, single nucleotide variant, host factor*

## 25 INTRODUCTION

26 All viruses rely on host factors to support their replication. Genetic variation in such proteins  
27 can affect susceptibility to infectious disease (Ciancanelli et al., 2016; Karlsson et al., 2014;  
28 Pittman et al., 2016; Zhang, 2020). Perhaps the best-known mutation conferring innate  
29 genetic resistance to viral infection is the  $\Delta 32$  variant of the HIV-1 co-receptor C-C  
30 chemokine receptor type 5 (*CCR5*) (Carrington et al., 1999). Single nucleotide variants that  
31 reduce susceptibility to virus infection include a P424A substitution in the filovirus endosomal  
32 fusion receptor Niemann-PickC1 (*NPC1*) (Carette et al., 2011; Kondoh et al., 2018), and a  
33 G428A mutation in fucosyltransferase 2 (*FUT2*) that renders homozygous carriers resistant  
34 to norovirus (Lindesmith et al., 2003; Thorven et al., 2005). A mutation in interferon-induced  
35 transmembrane protein 3 (*IFITM3*) has been associated with increased severity of infection  
36 with influenza virus (Ciancanelli et al., 2016; Everitt et al., 2012; Prabhu et al., 2018; Zhang  
37 et al., 2013), as have monogenic lesions of *GATA2*, *IRF7*, *IRF9* and *TLR3* (Zhang, 2020).  
38 Besides a pair of polymorphisms in the non-coding region (NCR) of *LGALS1*, which may  
39 confer some protection from H7N9 influenza A virus (IAV) in Chinese poultry workers (Chen  
40 et al., 2015), no single nucleotide variants protective against influenza virus have thus far  
41 been described.

42 Influenza replication and transcription are carried out in the host cell nucleus by the virus-  
43 encoded heterotrimeric RNA-dependent RNA polymerase (Te Velhuis and Fodor, 2016),  
44 which relies on host factors to support RNA synthesis (Peacock et al., 2019). Influenza

45 viruses co-opt the host proteins acidic nuclear phosphoprotein 32 kilodaltons A (ANP32A)  
46 and ANP32B to support their replication (Long et al., 2016; Staller et al., 2019; Zhang et al.,  
47 2019). ANP32A and ANP32B are functionally redundant in their support for influenza virus:  
48 in human cells lacking either but not both ANP32A (AKO) or ANP32B (BKO), virus  
49 proliferation is not impaired. In cells lacking both proteins (dKO), however, FluPol activity  
50 and virus growth are completely abrogated (Staller et al., 2019; Zhang et al., 2019). ANP32  
51 proteins are expressed in many different human tissues, including fibroblasts and lung  
52 (Lonsdale et al., 2013), and involved in a wide range of cellular processes, including  
53 apoptosis and transcriptional regulation (Reilly et al., 2014). ANP32A and ANP32B are 249  
54 and 251 amino acids long, respectively, with two major domains: a structured N-terminal  
55 leucine-rich repeat region (LRR) and an unresolved low-complexity acidic region (LCAR)  
56 (Huyton and Wolberger, 2007; Tochio et al., 2010). Mutational analysis of ANP32 proteins of  
57 several species relevant to influenza has shown that the identity of amino acid residues 129  
58 and 130 dictates pro-viral function (Long et al., 2019; Peacock et al., 2020; Staller et al.,  
59 2019; Zhang et al., 2019). ANP32 proteins that cannot be co-opted by influenza virus include  
60 human ANP32E (unpublished data), chicken ANP32B, and mouse ANP32A. What these  
61 orthologues have in common is divergence from the pro-viral dyad 129N-130D: human  
62 ANP32E has glutamate at position 129 (129E) rather than asparagine, chicken ANP32B has  
63 isoleucine at position 129 (129I) and asparagine at position 130 (130N), and mouse ANP32A  
64 has alanine at position 130 (130A), suggesting that these amino acids are important for pro-  
65 viral activity of ANP32 proteins.

66 Here we describe natural variation in the human *Anp32A* and *Anp32B* genes, in particular  
67 the relatively enriched SNV rs182096718 in *Anp32B*, which has a global minor allele  
68 frequency (MAF) of 0.0044 and is prevalent in 3.41% of individuals of Hispanic / Latino  
69 ethnicity. SNV rs182096718 translates to a mutant ANP32B-D130A protein product, and is  
70 the only variant for which homozygous carriers exist. We generated the homozygous mutant  
71 genotype (wildtype *Anp32A* / mutant *Anp32B*) in low-ploidy human eHAP cells  
72 (Essletzbichler et al., 2014) by CRISPR/Cas9 genome editing. Using minigenome reporter  
73 assays and virus challenge, we found that IAV FluPol activity and replication were severely  
74 restricted in monoclonal cells expressing wildtype ANP32A and ANP32B-D130A. We  
75 conclude that cells expressing ANP32B-D130A alongside wildtype ANP32A are less able to  
76 support influenza polymerase activity, even when compared with cells that lack ANP32B  
77 expression (BKO). This suggests a potential dominant negative effect of ANP32B-D130A on  
78 ANP32A pro-viral activity. We speculate that carriers of this variant may have some  
79 resistance to influenza viruses.

## 80 RESULTS

### 81 A relatively common variant encodes ANP32B-D130A

82 We searched public databases for rare missense SNVs in the human *Anp32A* and *Anp32B*  
83 genes that were predicted, on the basis of our previous work, to have functional impact on  
84 the pro-influenza virus activity of the proteins. The databases included the dbSNP from the  
85 National Center for Biotechnology Information (NCBI) (Sherry et al., 2001), the Avon  
86 Longitudinal Study of Parents and Children (ALSPAC) (Walter et al., 2015), Trans-Omics for  
87 Precision Medicine (TOPMed) (Taliun et al., 2019), the 1000 Genomes Project (Genomes  
88 Project et al., 2015), the Grand Opportunity Exome sequencing Project (GO-ESP) (Fu et al.,  
89 2013), and the genome aggregation database (gnomAD) (Karczewski et al., 2019). The  
90 latter lists a total 54 missense SNVs in *Anp32A* and 82 in *Anp32B*.

91 Four SNVs in *Anp32A* and five in *Anp32B* were selected for investigation, taking into  
92 account changes in charge, bulk, polarity and putative solvent exposure of the encoded

93 amino acid substitutions (Huyton and Wolberger, 2007; Tochio et al., 2010), as well as the  
 94 previously established importance of positions 129 and 130 for pro-influenza viral activity  
 95 (Figure 1A). All the variants in *Anp32A* are exceedingly rare (MAF<0.001), and no  
 96 homozygous carriers have been identified. The serine mutants at position 158 were selected  
 97 as this is a putative phosphorylation site (Hong et al., 2004). The SNV responsible for a  
 98 mutant ANP32A-D130N protein (rs771143708) is found in a single heterozygous individual  
 99 out of 3,854 in the ALSPAC cohort, rs751239680 (ANP32A-R132Q) is found in a single  
 100 heterozygous individual out of 10,052 in the African cohort of the gnomAD database,  
 101 rs772530468 (ANP32A-S158T) is present in a single South Asian male in 23,070 in the  
 102 gnomAD database, as well as two separate homozygous individuals in the TOPMed  
 103 database. Finally, a single African male in 5,032 in the gnomAD database is a heterozygous  
 104 carrier of rs772530468 (ANP32A-S158A) (Figure 1B).

105 Most variants in *Anp32B* were also low-frequency (MAF<0.0001): rs377406514 (ANP32B-  
 106 L128V) is found in a single African female out of 10,066 in the gnomAD database;  
 107 rs771977254 (ANP32B-E133Q) occurs in two out of 4,900 Ashkenazi Jewish females in the  
 108 gnomAD database; rs761932651 (ANP32B-L138H) is found in one South Asian male in  
 109 23,070 in the gnomAD database; rs770020996 (ANP32B-L142F) occurs in one female in  
 110 7,544 and one male in 23,072 from the South Asian cohort of the gnomAD database (Figure  
 111 1C). There is, however, an exception. SNV rs182096718, encoding ANP32B-D130A, is  
 112 relatively common in the Hispanic / Latino cohort of the gnomAD database, where in a total  
 113 pool of 35,420 alleles 1,209 minority alleles were identified, as well as 25 homozygous  
 114 carriers. The D130A substitution in ANP32B is thus present in 3.41% of the Latino cohort,  
 115 which, compared with all other SNVs in either *Anp32A* or *Anp32B* is a relatively high  
 116 frequency. We and others have previously shown that murine ANP32A, which naturally  
 117 harbours 130A, does not support influenza virus polymerase. Substituting 130A in human  
 118 ANP32A greatly reduced FluPol activity, while introducing 130D in mouse ANP32A rescued  
 119 its capacity to support FluPol activity (Staller et al., 2019; Zhang et al., 2019). Indeed,  
 120 ANP32B KO mice, but not ANP32A KO mice, showed reduced viral loads and mortality  
 121 when infected with H3N2 or H5N1 influenza A virus (Beck et al., 2020).

122

A

| Gene          | ID          | Variant | Amino acid substitution | Minor allele frequency | Source                              | Heterozygous carriers | Homozygous carriers |
|---------------|-------------|---------|-------------------------|------------------------|-------------------------------------|-----------------------|---------------------|
| <i>Anp32A</i> | rs771143708 | C>T     | D130N                   | T=0.0003               | ALSPAC                              | 1                     | 0                   |
|               | rs751239680 | C>T     | R132Q                   | T<0.0001               | ExAC                                | 1                     | 0                   |
|               | rs772530468 | A>C     | S158T                   | C<0.0001               | gnomAD<br>TOPMed                    | 3                     | 0                   |
|               |             | A>T     | S158A                   | T<0.0001               | ExAC<br>gnomAD                      | 1                     | 0                   |
| <i>Anp32B</i> | rs377406514 | C>G     | L128V                   | G<0.0001               | gnomAD                              | 1                     | 0                   |
|               | rs182096718 | A>C     | D130A                   | C=0.0044               | gnomAD<br>1000G<br>GO-ESP<br>TOPMed | 1,233                 | 25                  |
|               | rs771977254 | G>C     | E133Q                   | C<0.0001               | gnomAD                              | 2                     | 0                   |
|               | rs761932651 | T>A     | L138H                   | A<0.0001               | gnomAD                              | 1                     | 0                   |
|               | rs770020996 | C>T     | L142F                   | T<0.0001               | gnomAD                              | 2                     | 0                   |
|               |             |         |                         |                        |                                     |                       |                     |

B

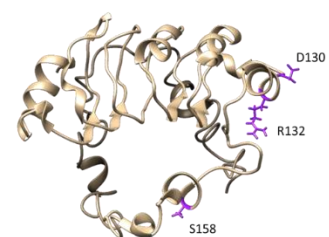

C

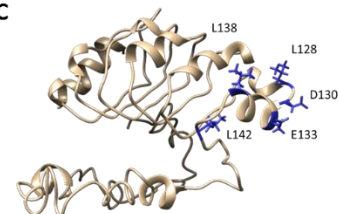

123

124 **Figure 1. Selected naturally occurring missense single nucleotide variants in *Anp32A* and**  
 125 ***Anp32B*** (A) NCBI dbSNP Reference IDs, variant, amino acid substitution, global minor allele  
 126 frequency (MAF), source database, and number of heterozygous and homozygous carriers for each

127 variant (B) Structural model of ANP32A showing amino acids affected by selected SNVs (C)  
 128 Structural model of ANP32B showing amino acids affected by selected SNVs

129

130 **Selected mutant ANP32 proteins affect FluPol activity**

131 The capacity of each mutant protein, when expressed exogenously in human eHAP cells  
 132 lacking ANP32A and ANP32B (dKO), to support reconstituted polymerases from a seasonal  
 133 H3N2 virus (A/Victoria/3/75) and a 2009 pandemic H1N1 isolate (A/England/195/2009) was  
 134 tested in minigenome reporter assays (Figure 2). ANP32A-D130N did not support IAV  
 135 polymerase, while R132Q and S158A substitutions were significantly reduced in their  
 136 capacity to support FluPol activity. ANP32A-S158T, in contrast, supported FluPol to an  
 137 extent similar to wildtype ANP32A (Figure 2A and B). ANP32B-D130A had a large  
 138 deleterious effect on the support for FluPol activity, as did the leucine to valine substitution at  
 139 position 128 (ANP32B-L128V). ANP32B-E133Q was also significantly less able to support  
 140 FluPol activity. Substitutions of the leucines at positions 138 and 142 to histidine (L138H)  
 141 and phenylalanine (L142F), respectively, did not reduce the ability of the mutant ANP32B  
 142 proteins to support FluPol activity (Figure 2D and E). None of the differences were explained  
 143 by changes in expression (Figure 2C and F) or nuclear localisation of the mutant proteins  
 144 (Supplementary Figure 1).

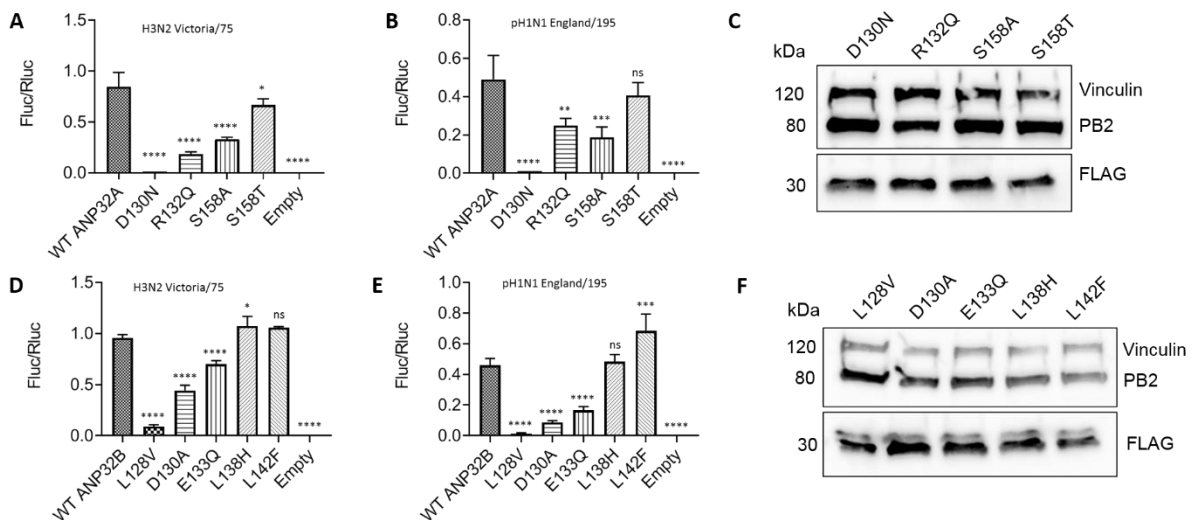

145

146 **Figure 2 ANP32A and B mutant proteins show variable capacity to rescue IAV FluPol activity**  
 147 (A) and (B) Minigenome reporter assays in eHAP dKO cells with co-transfected FLAG-tagged  
 148 ANP32A variants with H3N2 Victoria (A) or pH1N1 Eng/195 (B) RNP components (PB1, PB2, PA and  
 149 NP), pPoll-firefly luciferase minigenome reporter, and Renilla luciferase control. Data show mean (SD)  
 150 of firefly activity normalized to Renilla and analysed by one-way ANOVA from one representative  
 151 repeat (n = 2 independent triplicate experiments). Panels (D) and (E) show identical experiments with  
 152 ANP32B constructs. ns, not significant; \*, P < 0.05; \*\*, P < 0.01; \*\*\*, P < 0.001; \*\*\*\*, P < 0.0001. (C)  
 153 and (F) Western blotting analysis showing expression of H3N2 Victoria PB2 and FLAG tagged mutant  
 154 ANP32A (C) or ANP32B (F) constructs compared with Vinculin loading control. Blots are  
 155 representative of minigenome assays shown in (A) and (D), respectively.

156

157

158 Using a split luciferase complementation assay previously developed in our laboratory  
 159 (Cassonnet et al., 2011; Mistry et al., 2020) (Figure 3A) we next assessed whether the



160 ANP32 mutants whose pro-viral function was most impaired (ANP32A-D130N, ANP32B-  
161 L128V, and ANP32B-D130A) showed reduced binding to FluPol. The luciferase signal  
162 indicating binding of ANP32A-D130N to FluPol was reduced >7-fold, relative to wildtype  
163 ANP32A (Figure 3B). FluPol interactions of ANP32B-L128V and ANP32B-D130A were also  
164 reduced, resulting in luciferase signals of around half those measured with the wildtype  
165 ANP32B (Figure 3C). The poor pro-viral function of these mutants is thus, at least in part,  
166 explained by reduced interaction with trimeric influenza polymerase. Interestingly, binding of  
167 mouse ANP32A to Vic/75 H3N2 FluPol was reduced 2.5-fold compared with mouse  
168 ANP32B, and 3.2-fold compared with human ANP32A (Figure 3D)  
169

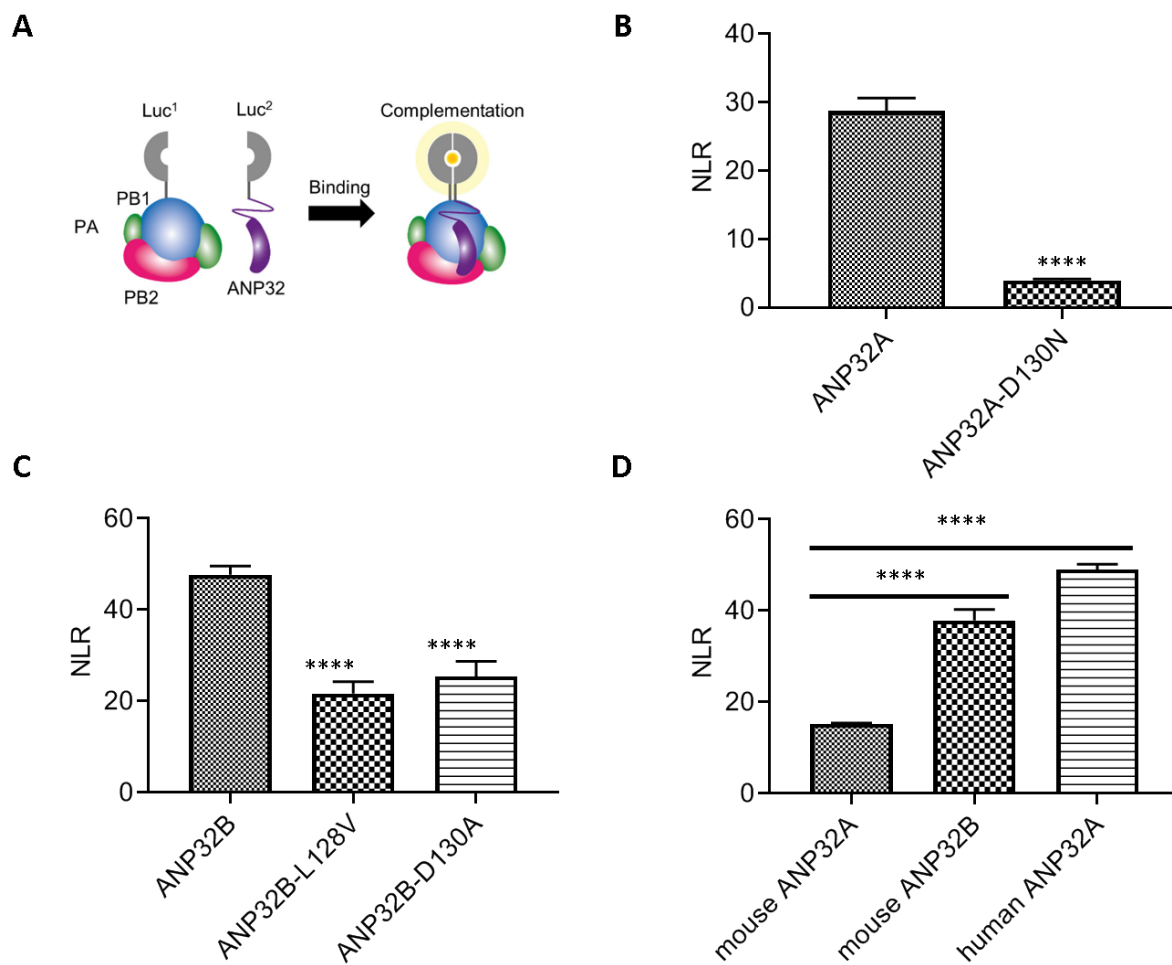

170

171 **Figure 3 Poor pro-viral function of ANP32 mutants correlates with poor binding to FluPol (A)**  
172 *Schematic of split luciferase complementation assay (adapted from Mistry et al. 2019) (B-D) Equal*  
173 *amounts (15 ng) of pCAGGS expression plasmids encoding H5N1 50-92 polymerase or H3N2*  
174 *components (PB1-luc1, PB2-627K and PA), as well as ANP32-luc2, were transfected into 293T cells.*  
175 *24 hours post-transfection cells were lysed and luminescence was measured. Two separate sets of*  
176 *control wells were transfected with either untagged PB1, PB2-627K, PA, ANP32-luc2 and unbound*  
177 *luc1, or untagged ANP32, PB1-luc1, PB2-627K, PA and unbound luc2. Total amount of plasmid (in*  
178 *ng) was kept constant by using empty pCAGGS. Normalised luminescence ratio (NLR) was obtained*  
179 *by dividing luminescence in the experimental condition (tagged PB1 + tagged ANP32) by the sum of*  
180 *the luminescence measured in the control conditions (i.e. background interaction of unbound luc1 with*  
181 *ANP32-luc2, and unbound luc2 with PB1-luc1, respectively). (B) Interaction between ANP32A-D130N*  
182 *mutant and H5N1 50-92 FluPol, compared with wildtype ANP32A (C) Interactions between ANP32B-*  
183 *L128V and ANP32B-D130A mutants and H5N1 50-92 FluPol, compared with wildtype ANP32B. (D)*

184 *Interaction between mouse ANP32A and Vic/75 FluPol compared with mouse ANP32B and human*  
185 *ANP32A. Data shown are mean (SD) representative of two independent triplicate experiments;*  
186 *statistical analysis in (B) by Student t-test, in (C and D<sup>2</sup>) by one-way ANOVA. \*\*\*\*, P < 0.0001*

187

188

189 As ANP32B-D130A is by far the most common SNV, and homozygous carriers of this variant  
190 exist, we focused our further efforts on this mutant. Although ANP32A and ANP32B are  
191 functionally redundant in their pro-viral activity, we reasoned the SNV might confer a  
192 phenotype if it exerted a dominant negative effect over wildtype ANP32A. To test this we  
193 titrated increasing concentrations of either wildtype ANP32B or ANP32B-D130A in dKO  
194 cells, alongside a constant amount of wildtype ANP32A (Supplementary Figure 2).  
195 Overexpressing ANP32B-D130A in the presence of wildtype ANP32A in dKO cells resulted  
196 in decreased FluPol activity. This effect was not seen when co-expressing wildtype ANP32B.

197

### 198 **Influenza A virus replication is attenuated in a monoclonal mutant cell line**

199 To further probe the potential significance of the ANP32B-D130A variant, we generated the  
200 homozygous wildtype *Anp32A* / mutant *Anp32B* genotype by CRISPR/Cas9 genome editing  
201 in eHAP cells. Using a human codon-optimized DNA endonuclease SpCas9 and a single-  
202 stranded DNA homology-directed repair (HDR) template to introduce the point mutation, we  
203 obtained a monoclonal cell line carrying the desired genotype (Supplementary Figure 3A-C).  
204 We selected an unsuccessfully edited clone to serve as a negative control, and carried out  
205 Western blotting analysis to ensure wildtype ANP32A and mutant ANP32B were expressed  
206 in control and mutant cells (Supplementary Figure 3D). Using minigenome reporter assays,  
207 we found that reconstituted polymerases from H3N2 Vic/75 and pH1N1 Eng/195 were less  
208 active in edited cells expressing wildtype ANP32A and ANP32B-D130A (Figure 4A and B).  
209 This was not due to differential expression of transfected RNP components (Figure 4C).

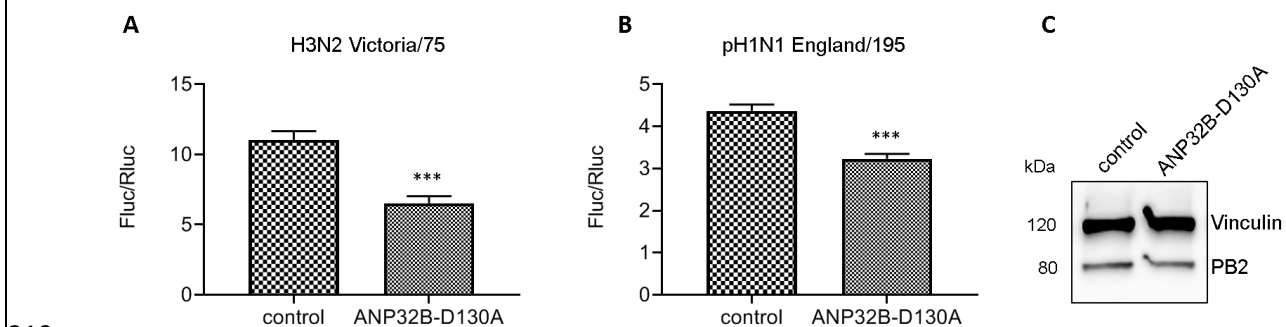

210

211 **Figure 4 FluPol activity is attenuated in ANP32B-D130A mutant cell line** Minigenome reporter  
212 assays in monoclonal CRISPR/Cas9-edited cells with H3N2 Victoria (A) and pH1N1 Eng/195 (B) RNP  
213 components (PB1, PB2, PA and NP), pPoll-firefly luciferase minigenome reporter, and *Renilla*  
214 luciferase control. Data show mean (SD) of firefly activity normalized to *Renilla* and analysed by  
215 Student t-test from one representative repeat ( $n = 2$  independent triplicate experiments). \*\*\*\*,  $P <$   
216  $0.001$  (C) Western blot analysis showing Vic/75 FluPol component PB2 expression in control and  
217 mutant cells.

218

219 Next we infected mutant and control cells with low-MOI (0.005) recombinant influenza A  
220 viruses containing internal genes from H3N2 Vic/75 and pH1N1 Eng/195 viruses, with the

221 neuraminidase (NA) and haemagglutinin (HA) external genes of the laboratory-adapted  
222 H1N1 PR/8 virus. In addition, we infected eHAP cells lacking ANP32B (BKO). Influenza A  
223 virus replication was severely attenuated in mutant cells, in comparison with either control or  
224 BKO cells, in particular at early time points. H3N2 Vic/75 infectious virus production in  
225 mutant cells was almost 100-fold lower than in control cells at 16h and 24h post-infection  
226 (Figure 5A). This difference was even more pronounced in cells infected with pH1N1  
227 Eng/195 virus, which at 24h and 48h post-infection is approximately 1000-fold less  
228 productive in mutant cells (Figure 5B). Both viruses replicated to higher titres in cells that  
229 completely lack ANP32B (BKO) than in cells expressing the ANP32B-D130A mutant.

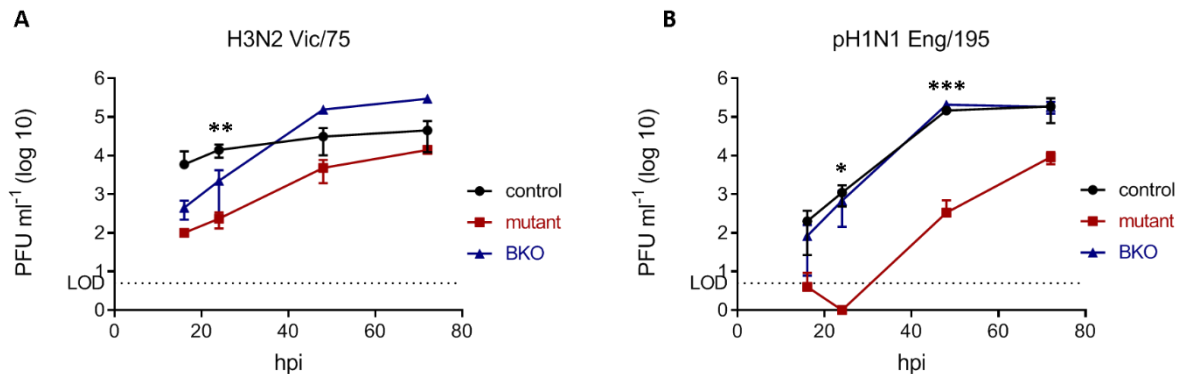

230

231 **Figure 5 IAV replication is attenuated in ANP32B-D130A mutant cells** Control (black), mutant  
232 (red), and BKO (blue) monoclonal cells were infected with H3N2 Victoria/75 (A) or pH1N1  
233 England/195 (B) 6:2 reassortant viruses with PR8 hemagglutinin (HA) and neuraminidase (NA) genes  
234 at MOI = 0.005 and incubated at 37°C in the presence of 1 µg/ml trypsin to allow multicycle  
235 replication. Supernatants were harvested at the indicated times post-infection and pfu/ml established  
236 by plaque assay on MDCK cells. LOD (dotted line) denotes the limit of detection in plaque assays.  
237 Shown are representative data from one of two independent infection experiments carried out in  
238 triplicate. P values were calculated per time point by student's t test and represent differences  
239 between control and mutant cell lines. \*P<0.05; \*\*P<0.01; \*\*\*P<0.01

240

## 241 DISCUSSION

242 Here, we used publicly available databases to perform a biased screen for naturally  
243 occurring single nucleotide variants in human *Anp32A* and *Anp32B*, under the hypothesis  
244 that some mutations may affect susceptibility to influenza virus infection. One of the  
245 mutations, which translates to an aberrant ANP32B-D130A protein, is highly enriched in  
246 carriers of Latino descent. Although most carriers of the SNV will be heterozygous for the  
247 mutation, 25 homozygotes are reported in the gnomAD database. We generated this  
248 naturally occurring homozygous genotype by CRISPR/Cas9 genome editing in low-ploidy  
249 human eHAP cells, and found that IAV FluPol activity and virus replication were significantly  
250 attenuated in the mutant cell line, compared to wildtype control cells or cells lacking  
251 ANP32B. Thus we have provided the first example of a single nucleotide variant in the  
252 coding region of a human gene that might confer some protection against influenza virus  
253 infection. The nucleotide substitution, an A>C transversion in exon 4 of the *Anp32B* gene,  
254 gives rise to a protein product bearing an alanine residue at position 130, in lieu of the  
255 canonical aspartate (ANP32B-D130A). This substitution entails a loss of a negatively  
256 charged amino acid with the potential to form a salt bridge or hydrogen bond with a potential  
257 binding partner. Indeed, using a split luciferase assay, we show reduced interaction of  
258 ANP32B-D130A with IAV polymerase.

259 Although we and others have previously reported redundancy in reconstituted systems for  
260 ANP32A and B in their support of FluPol activity (Staller et al., 2019; Zhang et al., 2019), the  
261 data presented here implies that deleterious mutations in one ANP32 protein might exert  
262 dominant negative effects on the pro-viral activity of the other. The mechanism behind the  
263 dominant negative effect cannot be readily explained by the split luciferase assay we used  
264 here that indicates that the D130A mutation weakens the interaction between ANP32B and  
265 FluPol. Further studies to elucidate the binding interfaces and valency of this virus-host  
266 interaction will be required to account for our findings.

267 In addition, it is important to bear in mind that the outcome of genetic variation will also  
268 depend on gene dosing in relevant tissues. The genotype-tissue expression (GTEx) portal  
269 uses whole genome sequencing and RNA-Seq data to estimate gene expression in 54 non-  
270 diseased human tissue types from nearly 1,000 individuals (Lonsdale et al., 2013). ANP32A  
271 and ANP32B are both clearly detectable in healthy lung tissue, at a median transcripts per  
272 kilobase million (TPM) of 42 and 201, respectively. There are thus 4.8-fold more ANP32B  
273 transcripts than ANP32A transcripts in the lung, suggesting that mutations that impair that  
274 pro-viral function of ANP32B such as ANP32B-D130A might have significant effects on virus  
275 replication in the major target tissue.

276 A caveat of the work here presented is the use of human eHAP cells where (primary)  
277 respiratory epithelium would have been preferable. We selected eHAP cells for their low  
278 ploidy, which renders CRISPR/Cas9 genome editing more straightforward. More commonly  
279 used laboratory cell lines like A549 or HEK-293 derivatives are polyploid (Giard et al., 1973;  
280 Graham et al., 1977; Lin et al., 2014). We have shown previously that eHAP cells are a  
281 suitable model for influenza virus infection (Long et al., 2019; Mistry et al., 2020; Peacock et  
282 al., 2020; Staller et al., 2019). A drawback of using a haploid cell line is that heterozygous  
283 genotypes cannot be generated. Thus far we have been unable to trace carriers of the  
284 variants but future work using diploid epithelial cells that reflect the heterozygous genotype  
285 could indicate whether heterozygotes are also likely to display reduced influenza  
286 susceptibility.

287 In conclusion, we have provided the first example of a single nucleotide variant in the coding  
288 region of a human gene that may offer carriers some protection against influenza virus. This  
289 work has the potential to help elucidate the mechanism through which ANP32 proteins  
290 support influenza virus replication, and can inform future intervention.

291

## 292 **ACKNOWLEDGEMENTS**

293 The authors wish to thank David Gaboriau for help with microscopy, and the St. Mary's NHLI  
294 FACS core facility for support, instrumentation, and help with single cell sorting. The Facility  
295 for Imaging by Light Microscopy (FILM) at Imperial College London is partially supported by  
296 funding from the Wellcome Trust (grant 104931/Z/14/Z) and BBSRC (grant BB/L015129/1)

297 E.S. was supported by an Imperial College President's Scholarship. L.B. was supported by  
298 Wellcome Trust grant 209213/Z/17/Z. R.F. was supported by Wellcome Trust grant  
299 200187/Z/15/Z. T.P.P. was supported by BBSRC grant BB/R013071/1. V.S.S. was  
300 supported by UKRI Future Leaders Fellowship MR/S032304/1. C.M.S. and W.S.B. were  
301 funded by Wellcome Trust grant 205100 and BBSRC grant BB/K002456/1.

## 302 **AUTHOR CONTRIBUTIONS**



303 Conceptualization, E.S. and W.S.B.; Methodology, E.S., C.M.S., V.S.S., and W.S.B.;  
304 Investigation, E.S., L.B., and R.F.; Resources, T.P.P.; Writing – Original Draft, E.S.; Writing  
305 – Review and Editing, all authors; Visualization, E.S. and C.M.S.; Supervision, C.M.S,  
306 V.S.S., and W.S.B.; Funding Acquisition, W.S.B.

## 307 **DECLARATION OF INTERESTS**

308 The authors declare no competing interests.

309

## 310 **EXPERIMENTAL PROCEDURES**

### 311 **Cell culture**

312 Human eHAP cells (Horizon Discovery) were cultured in Iscove's modified Dulbecco's  
313 medium (IMDM; Thermo Fisher) supplemented with 10% fetal bovine serum (FBS; Labtech),  
314 1% nonessential amino acids (NEAA; Gibco), and 1% penicillin/streptomycin (Invitrogen).  
315 Human embryonic kidney (293T) cells (ATCC) and Madin-Darby canine kidney (MDCK) cells  
316 (ATCC) were maintained in Dulbecco's modified Eagle's medium (DMEM; Invitrogen)  
317 supplemented with 10% FBS, 1% NEAAs, and 1% penicillin/streptomycin. All cells were  
318 maintained at 37°C in a 5% CO<sup>2</sup> atmosphere.

### 319 **Plasmids and cloning**

320 Human FLAG-tagged pCAGGS-ANP32A and ANP32B expression plasmids have been  
321 described (Staller et al., 2019). Mutant proteins were cloned from these plasmids by  
322 overlapping touchdown PCR, using primers CCAACCTGAATAACTACCGCGAGAAC and  
323 GTTCTCGCGGTAGTTATTCAGGTTGG (ANP32A-D130N),  
324 GAATGACTACCAAGAGAACGTGTTC and GAACACGTTCTCTTGGTAGTCATTC  
325 (ANP32A-R132Q), GAGGCCCTGATGCTGACGCCGAGG and  
326 CCTCGGCGTCAGCATCAGGGGCCTC (ANP32A-S158A),  
327 GAGGCCCTGATACTGACGCCGAGGGC and GCCCTCGGCGTCAGTATCAGGGGCCTC  
328 (ANP32A-S158T), GTGACAAACGTGAATGACTATCGG and  
329 CCGATAGTCATTCACGTTTGTAC (ANP32B-L128V),  
330 CAAACCTGAATGCCTATCGGGAGAGC and GCTCTCCCGATAGGCATTCAGGTTTG  
331 (ANP32B-D130A), GACTATCGGCAGAGCGTGTTTAAG and  
332 CTAAACACGCTCTGCCGATAGTC (ANP32B-E133Q),  
333 GAGAGCGTGTTTAAGCACCTGCCACAGCTG and  
334 CAGCTGTGGCAGGTGCTTAAACACGCTCTC (ANP32B-L138H),  
335 GTTGCTGCCACAGTTTACTTATCTCGA and TCGAGATAAGTAACTGTGGCAGCAAC  
336 (ANP32B-L142F). Expression plasmids encoding H3N2 Vic/75 and pH1N1 RNP  
337 components PB1, PB2, PA and NP have been described (Staller et al., 2019), as have  
338 pCAGGS-ANP32A<sub>luc2C</sub>, pCAGGS-luc1, pCAGGS-luc2, and H5N1 50-92 PB1<sub>luc1C</sub> (Long et al.,  
339 2019; Mistry et al., 2020). pPoll reporter plasmid containing firefly luciferase flanked by IAV-  
340 specific promoters, and pCAGGS-*Renilla* luciferase transfection / cellular transcription  
341 control have been previously described (Staller et al., 2019). Expression plasmids pCAGGS-  
342 ANP32B<sub>luc2C</sub>, ANP32A-D130N<sub>luc2C</sub>, ANP32B-L128V<sub>luc2C</sub>, and ANP32B-D130A<sub>luc2C</sub> were  
343 cloned by overlapping touchdown PCR. All plasmid constructs were verified by Sanger  
344 sequencing and analyzed in Geneious prime 2019.

345

### 346 **CRISPR/Cas9 genome editing**

347 Guide RNA GCACTCTCTCGGTAGTCATTC was designed manually against the  
348 protospacer sequence in exon 4 of *Anp32B* to target DNA endonuclease SpCas9, expressed  
349 from Addgene plasmid # 62988 (PX459), to the target nucleotide (Supplementary Figure  
350 3A). The guide RNA itself was cloned into Addgene plasmid # 80457 (pmCherry\_gRNA). A  
351 custom-designed 88 base ssODN (single strand DNA) homology-directed repair template,  
352 harbouring the point mutation (cytosine in bold) and a silent PAM mutation (thymidine in italic  
353 script) –  
354 GAAAAGCCTGGACCTCTTTAACTGTGAGGTTACCAA TCTGAATGCCTACCGAGAGAGTG  
355 TCTTCAAGCTCCTGCCCCAGCTTACCTAC – was obtained from Integrated DNA  
356 Technologies (IDT). Equal amounts of PX459 and pmCherry\_gRNA (total 1 µg), and 1.0 µl  
357 10 µM ssODN template, were transfected by electroporation into approximately 400,000  
358 eHAP cells using the Neon™ transfection system (Invitrogen). Cells and DNA were mixed  
359 into a 10 µl volume of suspension buffer, which was subjected to a single 1,200 Volt pulse  
360 for a duration of 40 ms. Cells were incubated at 37°C for 24 hours in IMDM growth medium  
361 without antibiotics. A fluorescence-activated cell sorter (FACS) Aria IIIU (BD Biosciences)  
362 with an 85-µm nozzle was used to sort cells expressing mCherry (550-650 nm emission) into  
363 96-well plates containing growth medium. Single cells were grown out into monoclonal  
364 populations over a period of 10 to 14 days. Total genomic DNA was extracted using the  
365 Purelink™ Genomic DNA Mini Kit (Invitrogen) and amplified by touchdown PCR to generate  
366 a 1,561-base pair fragment of the edited locus (primers TACCTCTGCCCTCTCAATCTCT  
367 and ACGCACACAAACACACACTATT). PCR products were then incubated at 65°C for 30  
368 minutes in the presence of BsmI restriction enzyme (NEB). The resulting DNA fragments  
369 were separated by 1.5% agarose gel electrophoresis. Potentially successfully edited clones  
370 were verified by Sanger sequencing (primers TAAAGACCGCTTGATACCCAGG and  
371 TGAGGCTGAGTGGGTAGTGG), and analysed in Geneious prime 2019.

372

### 373 **Minigenome reporter assays**

374 In order to measure influenza virus polymerase activity, pCAGGS expression plasmids  
375 encoding H3N2 Vic/75 or pH1N1 Eng/195 PB1 (0.02 µg), PB2 (0.02 µg), PA (0.01 µg), and  
376 NP (0.04 µg) were transfected into 100,000 eHAP cells using Lipofectamine 3000 (Thermo  
377 Fisher) at ratios of 2 µl P3000 reagent and 3 µl Lipofectamine 3000 reagent per µg plasmid  
378 DNA. As a reporter construct, we transfected 0.02 µg pPoll-luc, which encodes a  
379 minigenome containing a firefly luciferase reporter flanked by influenza A virus promoter  
380 sequences. pCAGGS-*Renilla* luciferase (0.02 µg) was co-transfected as a transfection and  
381 toxicity control. 0.04 micrograms of the indicated ANP32-FLAG constructs was co-expressed  
382 to determine their effect on polymerase activity. Twenty-four hours after transfection, cells  
383 were lysed in 50 µl passive lysis buffer (Promega) for 30 minutes at room temperature with  
384 gentle shaking. Bioluminescence generated by firefly and *Renilla* luciferases was measured  
385 using the dual-luciferase system (Promega) on a FLUOstar Omega plate reader (BMG  
386 Labtech).

387

### 388 **Split luciferase complementation assay**

389 pCAGGS expression plasmids encoding H5N1 50-92 or H3N2 Vic/75 PB1<sub>luc1C</sub>, PB2-627K,  
390 PA, and the relevant ANP32<sub>luc2C</sub> construct were transfected into 100,000 293T cells at a ratio  
391 of 1:1:1:1 (15 ng per well). Control conditions contained pCAGGS-luc1 and untagged PB1,  
392 or pCAGGS-luc2 and untagged ANP32A, respectively, with all other components remaining  
393 constant. Empty pCAGGS plasmid was used to ensure total transfected DNA was equal

394 across conditions. Twenty-four hours after transfection, cells were lysed in 50  $\mu$ l *Renilla* lysis  
395 buffer (Promega) for 1 h at room temperature with gentle shaking (*Gaussia* and *Renilla*  
396 luciferase share the same substrate). Bioluminescence generated by *Gaussia* luciferase was  
397 measured using the Renilla luciferase kit (Promega) on a FLUOstar Omega plate reader  
398 (BMG Labtech). Normalized luminescence ratios (NLR) were calculated by dividing the  
399 signal from the potential interacting partners by the sum of the two controls, as described  
400 (Mistry et al., 2020).

#### 401 **Western blotting**

402 At least 250,000 cells were lysed in buffer containing 50 mM Tris-HCl (pH 7.8; Sigma-  
403 Aldrich), 100 mM NaCl, 50 mM KCl, and 0.5% Triton X-100 (Sigma-Aldrich), supplemented  
404 with a cOMplete EDTA-free protease inhibitor cocktail tablet (Roche) and prepared in  
405 Laemmli 4x buffer (Bio-Rad) after protein concentration had been established by  
406 spectrophotometry (DeNovix DS-11 FX+ spectrophotometer). Equal amounts of total protein  
407 (20-50  $\mu$ g per lane) was resolved by SDS-PAGE using Mini Protean TGX precast gels 4% to  
408 20% (Bio-Rad). Immunoblotting by semi-dry transfer (Bio-Rad Trans-Blot SD semidry  
409 transfer cell) onto nitrocellulose membranes (Amersham Protran Premium 0.2  $\mu$ m NC; GE  
410 Healthcare) was carried out using the following primary antibodies: rabbit  $\alpha$ -vinculin (catalog  
411 number ab129002, 1/1,000; Abcam), rabbit  $\alpha$ -ANP32A (catalog number ab51013, 1/500;  
412 Abcam), rabbit  $\alpha$ -ANP32B (10843-1-AP, 1/1,000; Proteintech), mouse  $\alpha$ -FLAG (catalog  
413 number F1804, 1/500; Sigma-Aldrich) and rabbit  $\alpha$ -IAV PB2 (catalog number GTX125926,  
414 1/2,000; GeneTex). The following secondary antibodies were used: sheep  $\alpha$ -rabbit  
415 horseradish peroxidase (HRP) (catalog number AP510P, 1/10,000; Merck) and goat  $\alpha$ -  
416 mouse HRP (STAR117P, 1/5,000; AbD Serotec). Protein bands were visualized by  
417 chemiluminescence using SuperSignal™ West Femto substrate (ThermoFisher Scientific) on a  
418 Fusion-FX imaging system (Vilber Lourmat).

#### 419 **Immunofluorescence microscopy**

420 Approximately 100,000 eHAP cells were cultured on sterilised glass coverslips and  
421 transfected as per minigenome reporter assay protocol. Twenty-four hours after transfection,  
422 cells were fixed in 4% paraformaldehyde and permeabilized in 0.2% Triton X-100. FLAG-  
423 tagged ANP32 constructs were visualised with primary antibody mouse  $\alpha$ -FLAG (F1804;  
424 1/200; Sigma) for 2 hours at 37°C in a humidified chamber. Cells were incubated with  
425 secondary antibody goat  $\alpha$ -mouse Alexa Fluor-568 (1/200; Life Technologies) for 1 hour at  
426 37°C in a humidified chamber, and counterstained with DAPI. Coverslips were mounted on  
427 glass slides using Vectashield mounting medium (H-1000-10; Vector Laboratories). Cells  
428 were imaged with a Zeiss Cell Observer widefield microscope with ZEN Blue software, using  
429 a Plan-Apochromat x100 1.40-numerical aperture oil objective (Zeiss), an Orca-Flash 4.0  
430 complementary metal-oxide semiconductor (CMOS) camera (frame, 2,048 x 2,048 pixels;  
431 Hamamatsu), giving a pixel size of 65 nm, and a Colibri 7 light source (Zeiss). Channels  
432 acquired and filters for excitation and emission were 4',6-diamidino-2- phenylindole (DAPI)  
433 (excitation [ex], 365/12 nm, emission [em] 447/60 nm), and TexasRed (ex 562/40 nm, em  
434 624/40 nm). All images were analyzed and prepared with Fiji software.

#### 435 **Influenza virus infection**

436 500,000 CRISPR/Cas9-modified monoclonal eHAP cells were infected with ~2,500 plaque-  
437 forming units (PFU) H3N2 Vic/75 6:2 or pH1N1 Eng/195 6:2 virus diluted in 200  $\mu$ l serum-  
438 free IMDM for 1 hour at 37°C (MOI 0.005) to allow virus to adsorb and enter the cells. The  
439 inoculum was removed and cells were incubated in room-temperature phosphate-buffered  
440 saline / HCl at pH 3.0 for 3 minutes to inactivate residual virus. Cells were incubated at 37°C

441 in serum-free cell culture medium (IMDM) supplemented with 1 µg/ml L-1-tosylamide-2-  
442 phenylethyl chloromethyl ketone (TPCK) trypsin (Worthington-Biochemical). Cell  
443 supernatants were harvested at indicated time points post-infection. Infectious titres were  
444 determined by plaque assay on MDCK cells. Virus infection assays were performed in  
445 triplicate on two separate occasions.

#### 446 **Safety/biosecurity**

447 All work with infectious agents was conducted in biosafety level 2 facilities, approved by the  
448 Health and Safety Executive of the United Kingdom and in accordance with local rules, at  
449 Imperial College London, United Kingdom.

#### 450 **Structural modelling**

451 Structural models of ANP32A and B were created using iTASSER structural prediction  
452 software (based primarily on huANP32B [GenBank accession number 2RR6A] and  
453 huANP32A [accession number 2JQDA], and 2JEOA). The three-dimensional structural  
454 models were visualized and created in UCSF Chimera. Amino acid residues affected by  
455 selected SNVs are highlighted in purple (ANP32A) or blue (ANP32B) stick format.

#### 456 **Bioinformatics**

457 Human genomic information was obtained using the following publicly available databases:  
458 gnomAD (<https://gnomad.broadinstitute.org/>); NCBI dbSNP  
459 (<https://www.ncbi.nlm.nih.gov/snp/>); ALSPAC (<http://www.bristol.ac.uk/alspac/>); TOPMed  
460 (<https://www.nhlbiwgs.org/>); 1000G (<https://www.internationalgenome.org/>); GO-ESP  
461 (<https://esp.gs.washington.edu/drupal/>)

462

#### 463 **REFERENCES**

464 .

- 465 Beck, S., Zickler, M., Pinho dos Reis, V., Günther, T., Grundhoff, A., Reilly, P.T., Mak, T.W., Stanelle-  
466 Bertram, S., and Gabriel, G. (2020). ANP32B Deficiency Protects Mice From Lethal Influenza A Virus  
467 Challenge by Dampening the Host Immune Response. *Frontiers in Immunology* 11.
- 468 Carette, J.E., Raaben, M., Wong, A.C., Herbert, A.S., Obernosterer, G., Mulherkar, N., Kuehne, A.I.,  
469 Kranzusch, P.J., Griffin, A.M., and Ruthel, G. (2011). Ebola virus entry requires the cholesterol  
470 transporter Niemann–Pick C1. *Nature* 477, 340-343.
- 471 Carrington, M., Dean, M., Martin, M.P., and O'Brien, S.J. (1999). Genetics of HIV-1 Infection:  
472 Chemokine Receptor Ccr5 Polymorphism and Its Consequences. *Human Molecular Genetics* 8, 1939-  
473 1945.
- 474 Cassonnet, P., Rolloy, C., Neveu, G., Vidalain, P.O., Chantier, T., Pellet, J., Jones, L., Muller, M.,  
475 Demeret, C., Gaud, G., *et al.* (2011). Benchmarking a luciferase complementation assay for detecting  
476 protein complexes. *Nature methods* 8, 990-992.
- 477 Chen, Y., Zhou, J., Cheng, Z., Yang, S., Chu, H., Fan, Y., Li, C., Wong, B.H., Zheng, S., Zhu, Y., *et al.*  
478 (2015). Functional variants regulating LGALS1 (Galectin 1) expression affect human susceptibility to  
479 influenza A(H7N9). *Scientific reports* 5, 8517.
- 480 Ciancanelli, M.J., Abel, L., Zhang, S.Y., and Casanova, J.L. (2016). Host genetics of severe influenza:  
481 from mouse Mx1 to human IRF7. *Current opinion in immunology* 38, 109-120.
- 482 Essletzbichler, P., Konopka, T., Santoro, F., Chen, D., Gapp, B.V., Kralovics, R., Brummelkamp, T.R.,  
483 Nijman, S.M., and Burckstummer, T. (2014). Megabase-scale deletion using CRISPR/Cas9 to generate  
484 a fully haploid human cell line. *Genome research* 24, 2059-2065.



485 Everitt, A.R., Clare, S., Pertel, T., John, S.P., Wash, R.S., Smith, S.E., Chin, C.R., Feeley, E.M., Sims, J.S.,  
486 Adams, D.J., *et al.* (2012). IFITM3 restricts the morbidity and mortality associated with influenza.  
487 *Nature* 484, 519-523.

488 Fu, W., O'Connor, T.D., Jun, G., Kang, H.M., Abecasis, G., Leal, S.M., Gabriel, S., Rieder, M.J.,  
489 Altshuler, D., Shendure, J., *et al.* (2013). Analysis of 6,515 exomes reveals the recent origin of most  
490 human protein-coding variants. *Nature* 493, 216-220.

491 Genomes Project, C., Auton, A., Brooks, L.D., Durbin, R.M., Garrison, E.P., Kang, H.M., Korbel, J.O.,  
492 Marchini, J.L., McCarthy, S., McVean, G.A., *et al.* (2015). A global reference for human genetic  
493 variation. *Nature* 526, 68-74.

494 Giard, D.J., Aaronson, S.A., Todaro, G.J., Arnstein, P., Kersey, J.H., Dosik, H., and Parks, W.P. (1973).  
495 In vitro cultivation of human tumors: establishment of cell lines derived from a series of solid  
496 tumors. *Journal of the National Cancer Institute* 51, 1417-1423.

497 Graham, F.L., Smiley, J., Russell, W.C., and Nairn, R. (1977). Characteristics of a human cell line  
498 transformed by DNA from human adenovirus type 5. *The Journal of general virology* 36, 59-74.

499 Hong, R., Macfarlan, T., Kutney, S.N., Seo, S.-b., Mukai, Y., Yelin, F., Pasternack, G.R., and Chakravarti,  
500 D. (2004). The Identification of Phosphorylation Sites of pp32 and Biochemical Purification of a  
501 Cellular pp32-kinase. *Biochemistry* 43, 10157-10165.

502 Huyton, T., and Wolberger, C. (2007). The crystal structure of the tumor suppressor protein pp32  
503 (Anp32a): structural insights into Anp32 family of proteins. *Protein science : a publication of the*  
504 *Protein Society* 16, 1308-1315.

505 Karczewski, K.J., Francioli, L.C., Tiao, G., Cummings, B.B., Alföldi, J., Wang, Q., Collins, R.L., Laricchia,  
506 K.M., Ganna, A., Birnbaum, D.P., *et al.* (2019). Variation across 141,456 human exomes and genomes  
507 reveals the spectrum of loss-of-function intolerance across human protein-coding genes. *bioRxiv*,  
508 531210.

509 Karlsson, E.K., Kwiatkowski, D.P., and Sabeti, P.C. (2014). Natural selection and infectious disease in  
510 human populations. *Nature Reviews Genetics* 15, 379-393.

511 Kondoh, T., Letko, M., Munster, V.J., Manzoor, R., Maruyama, J., Furuyama, W., Miyamoto, H.,  
512 Shigeno, A., Fujikura, D., Takadate, Y., *et al.* (2018). Single-Nucleotide Polymorphisms in Human  
513 NPC1 Influence Filovirus Entry Into Cells. *The Journal of infectious diseases* 218, S397-s402.

514 Lin, Y.C., Boone, M., Meuris, L., Lemmens, I., Van Roy, N., Soete, A., Reumers, J., Moisse, M.,  
515 Plaisance, S., Drmanac, R., *et al.* (2014). Genome dynamics of the human embryonic kidney 293  
516 lineage in response to cell biology manipulations. *Nat Commun* 5, 4767.

517 Lindesmith, L., Moe, C., Marionneau, S., Ruvoen, N., Jiang, X., Lindblad, L., Stewart, P., LePendou, J.,  
518 and Baric, R. (2003). Human susceptibility and resistance to Norwalk virus infection. *Nature medicine*  
519 9, 548-553.

520 Long, J.S., Giotis, E.S., Moncorge, O., Frise, R., Mistry, B., James, J., Morisson, M., Iqbal, M., Vignal, A.,  
521 Skinner, M.A., *et al.* (2016). Species difference in ANP32A underlies influenza A virus polymerase  
522 host restriction. *Nature* 529, 101-104.

523 Long, J.S., Idoko-Akoh, A., Mistry, B., Goldhill, D., Staller, E., Schreyer, J., Ross, C., Goodbourn, S.,  
524 Shelton, H., Skinner, M.A., *et al.* (2019). Species specific differences in use of ANP32 proteins by  
525 influenza A virus. *eLife* 8, e45066.

526 Lonsdale, J., Thomas, J., Salvatore, M., Phillips, R., Lo, E., Shad, S., Hasz, R., Walters, G., Garcia, F.,  
527 Young, N., *et al.* (2013). The Genotype-Tissue Expression (GTEx) project. *Nature Genetics* 45, 580-  
528 585.

529 Mistry, B., Long, J.S., Schreyer, J., Staller, E., Sanchez-David, R.Y., and Barclay, W.S. (2020).  
530 Elucidating the Interactions between Influenza Virus Polymerase and Host Factor ANP32A. *Journal of*  
531 *virology* 94, e01353-01319.

532 Peacock, T.P., Sheppard, C.M., Staller, E., and Barclay, W.S. (2019). Host Determinants of Influenza  
533 RNA Synthesis. *Annual Review of Virology* 6, 215-233.

534 Peacock, T.P., Swann, O.C., Staller, E., Leung, P.B., Goldhill, D.H., Zhou, H., Long, J.S., and Barclay,  
535 W.S. (2020). Swine ANP32A supports avian influenza virus polymerase. *bioRxiv*,  
536 2020.2001.2024.916916.

537 Pittman, K.J., Glover, L.C., Wang, L., and Ko, D.C. (2016). The legacy of past pandemics: common  
538 human mutations that protect against infectious disease. *PLoS pathogens* 12.

539 Prabhu, S.S., Chakraborty, T.T., Kumar, N., and Banerjee, I. (2018). Association between IFITM3  
540 rs12252 polymorphism and influenza susceptibility and severity: A meta-analysis. *Gene* 674, 70-79.

541 Reilly, P.T., Yu, Y., Hamiche, A., and Wang, L. (2014). Cracking the ANP32 whips: important functions,  
542 unequal requirement, and hints at disease implications. *BioEssays : news and reviews in molecular,*  
543 *cellular and developmental biology* 36, 1062-1071.

544 Sherry, S.T., Ward, M.H., Kholodov, M., Baker, J., Phan, L., Smigielski, E.M., and Sirotkin, K. (2001).  
545 dbSNP: the NCBI database of genetic variation. *Nucleic acids research* 29, 308-311.

546 Staller, E., Sheppard, C.M., Neasham, P.J., Mistry, B., Peacock, T.P., Goldhill, D.H., Long, J.S., and  
547 Barclay, W.S. (2019). ANP32 Proteins Are Essential for Influenza Virus Replication in Human Cells.  
548 *Journal of virology* 93.

549 Taliun, D., Harris, D.N., Kessler, M.D., Carlson, J., Szpiech, Z.A., Torres, R., Taliun, S.A.G., Corvelo, A.,  
550 Gogarten, S.M., Kang, H.M., *et al.* (2019). Sequencing of 53,831 diverse genomes from the NHLBI  
551 TOPMed Program. *bioRxiv*, 563866.

552 Te Velthuis, A.J., and Fodor, E. (2016). Influenza virus RNA polymerase: insights into the mechanisms  
553 of viral RNA synthesis. *Nature reviews Microbiology* 14, 479-493.

554 Thorven, M., Grahn, A., Hedlund, K.-O., Johansson, H., Wahlfrid, C., Larson, G., and Svensson, L.  
555 (2005). A Homozygous Nonsense Mutation (428G→A) in the Human Secretor (<em>FUT2</em>  
556 Gene Provides Resistance to Symptomatic Norovirus (GGII) Infections. *Journal of virology* 79, 15351-  
557 15355.

558 Tochio, N., Umehara, T., Munemasa, Y., Suzuki, T., Sato, S., Tsuda, K., Koshiba, S., Kigawa, T., Nagai,  
559 R., and Yokoyama, S. (2010). Solution structure of histone chaperone ANP32B: interaction with core  
560 histones H3-H4 through its acidic concave domain. *Journal of molecular biology* 401, 97-114.

561 Walter, K., Min, J.L., Huang, J., Crooks, L., Memari, Y., McCarthy, S., Perry, J.R., Xu, C., Futema, M.,  
562 Lawson, D., *et al.* (2015). The UK10K project identifies rare variants in health and disease. *Nature*  
563 526, 82-90.

564 Zhang, H., Zhang, Z., Wang, Y., Wang, M., Wang, X., Zhang, X., Ji, S., Du, C., Chen, H., and Wang, X.  
565 (2019). Fundamental Contribution and Host Range Determination of ANP32A and ANP32B in  
566 Influenza A Virus Polymerase Activity. *Journal of virology* 93.

567 Zhang, Q. (2020). Human genetics of life-threatening influenza pneumonitis. *Human genetics*.

568 Zhang, Y.-H., Zhao, Y., Li, N., Peng, Y.-C., Giannoulatou, E., Jin, R.-H., Yan, H.-P., Wu, H., Liu, J.-H., Liu,  
569 N., *et al.* (2013). Interferon-induced transmembrane protein-3 genetic variant rs12252-C is  
570 associated with severe influenza in Chinese individuals. *Nature Communications* 4, 1418.

571  
572  
573

574 **SUPPLEMENTARY FIGURES**

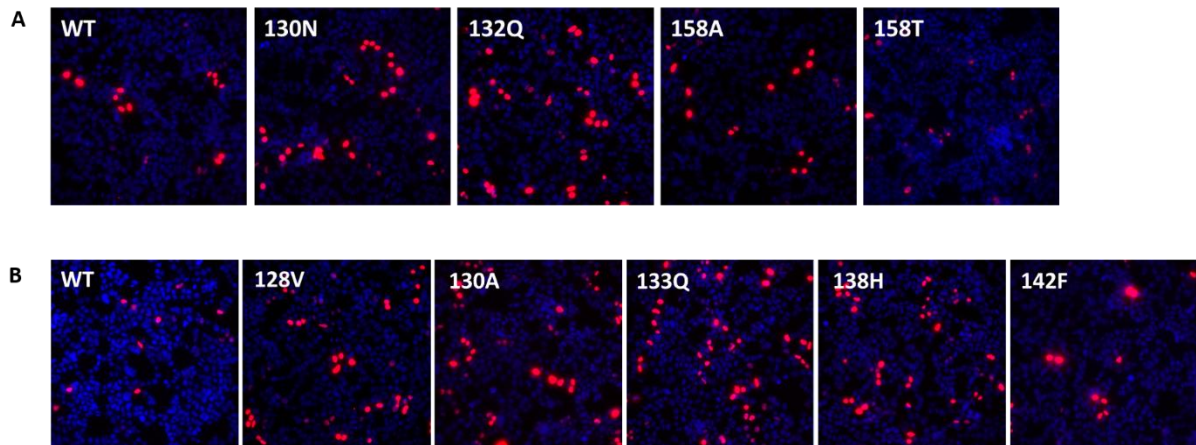

575

576 **Supplementary Figure 1. Mutant ANP32 proteins localise to the cell nucleus**  
 577 Immunofluorescence analysis showing nuclear localisation of mutant FLAG-tagged ANP32A (A) or  
 578 ANP32B (B) proteins, detected with anti-FLAG primary antibody and Alexa Fluor-568 anti-mouse  
 579 conjugate and counterstained with DAPI

580

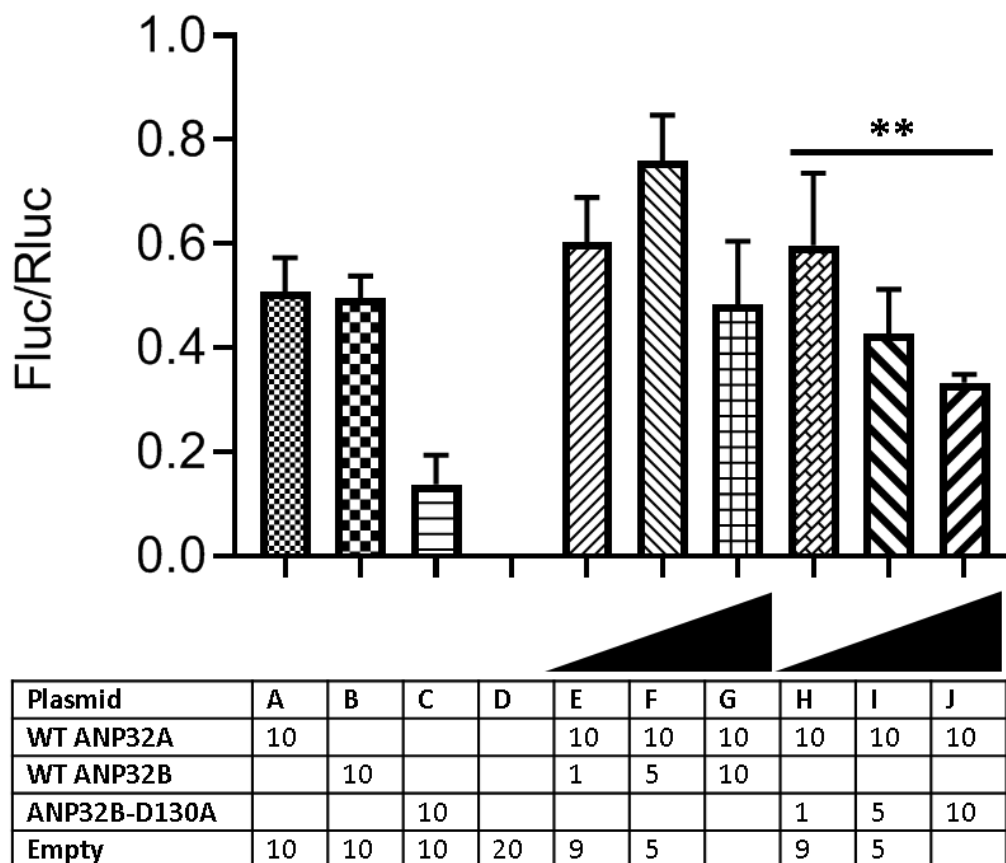

581

582 **Supplementary Figure 2 ANP32B-D130A exerts a dominant negative effect over ANP32A**  
 583 Minigenome reporter assay in approximately 100,000 dKO cells with reconstituted pH1N1 Eng/195  
 584 RNP components (PB1, PB2, PA and NP), pPoll-firefly luciferase minigenome reporter, and Renilla  
 585 control. Conditions contain indicated amounts (in ng) of co-transfected FLAG-tagged pCAGGS-

586 *ANP32A* (WT *ANP32A*), *ANP32B* (WT *ANP32B*) or *ANP32B-D130A*. Empty *pCAGGS* was used to  
 587 make sure equal amounts of total DNA were transfected across conditions. Data show mean (SD) of  
 588 firefly activity normalized to *Renilla* and analysed by one-way ANOVA. \*\*,  $P < 0.01$ .

589  
 590  
 591  
 592  
 593  
 594

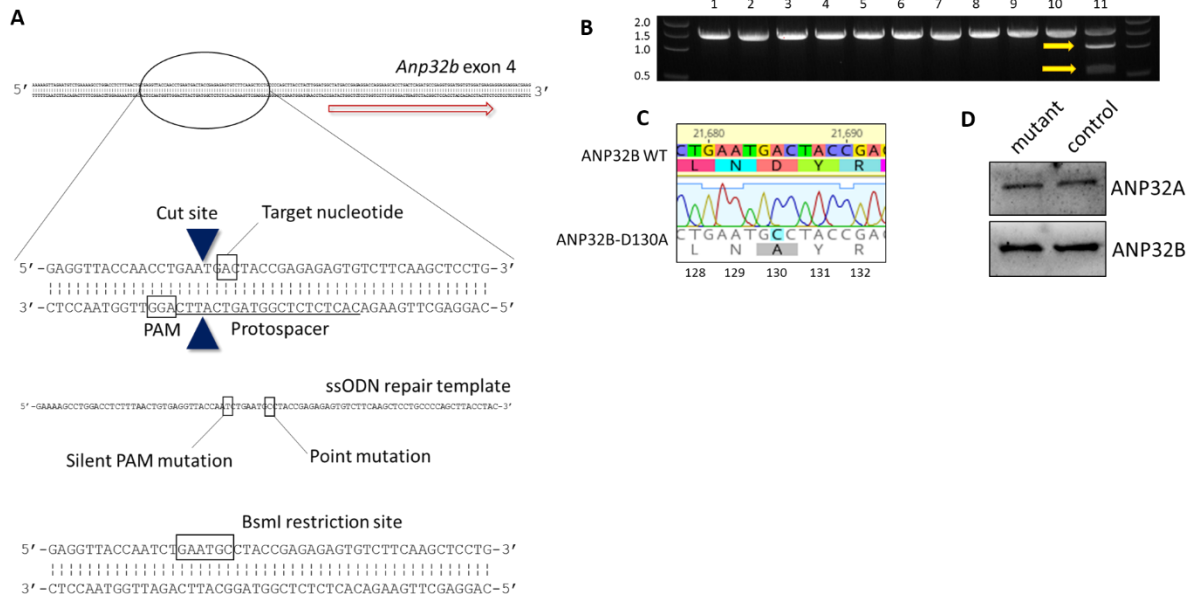

595

596 **Supplementary Figure 3 Generation of naturally occurring mutant genotype by genome editing**  
 597 (A) *Anp32B* is located on Chromosome 9, with the codon encoding 130D in exon 4 of the gene. The  
 598 red arrow indicates the reading direction. A protospacer-adjacent motif (PAM) was identified near the  
 599 target adenine on the opposite DNA strand, and a guide RNA was designed against the protospacer  
 600 (underlined). SpCas9 cut two base pairs upstream of the target nucleotide (dark blue arrowheads). An  
 601 88-base single-stranded DNA (ssODN) homology-directed repair (HDR) template was designed  
 602 bearing the missense A>C substitution as well as a silent PAM mutation between homology arms. A  
 603 successful edit introduced a BsmI restriction site (GAATGC) not present in the wildtype allele,  
 604 enabling screening by PCR amplification of a 1,561 base pair genome fragment followed by restriction  
 605 digestion of the PCR product (B). A successfully edited allele is cleaved into 1,008 and 553 base pair  
 606 DNA fragments. Potentially positive clones were verified by Sanger sequencing (C). (D) Western  
 607 blotting analysis with specific antibodies against ANP32A and ANP32B in a mutant and control  
 608 monoclonal cell line shows equal expression of both proteins.

609
